# Supplementary material
Source: PubMed Central journal article supplement (PMC4106025)
Supplement: NIHMS554941-supplement-supplementary_data.pdf [file NIHMS554941-supplement-supplementary_data.pdf]

## Supplementary Information:

### **Act1 mediates IL-17-induced EAE pathogenesis selectively in NG2<sup>+</sup> glial cells**

Zizhen Kang,<sup>1,2</sup> Chenhui Wang,<sup>2</sup> Jarod Zepp,<sup>2</sup> Ling Wu,<sup>2</sup> Kevin Sun,<sup>2</sup> Junjie Zhao,<sup>2</sup> Unni Chandrasekharan,<sup>3</sup> Paul E. DiCorleto,<sup>3</sup> Bruce D. Trapp,<sup>4</sup> Richard M. Ransohoff,<sup>4,5,6</sup> Xiaoxia Li<sup>2,\*</sup>

<sup>1</sup>Shanghai Institute of Immunology, Shanghai Jiao Tong University School of Medicine, Shanghai, China.

<sup>2</sup>Department of Immunology

<sup>3</sup>Department of Cellular and Molecular Medicine

<sup>4</sup>Department of Neuroscience

<sup>5</sup>Neuroinflammation Research Center

<sup>6</sup>Mellen Center for MS Treatment and Research  
Cleveland Clinic, Cleveland, OH, USA

\*Correspondence should be addressed to Xiaoxia Li, [lix@ccf.org](mailto:lix@ccf.org)

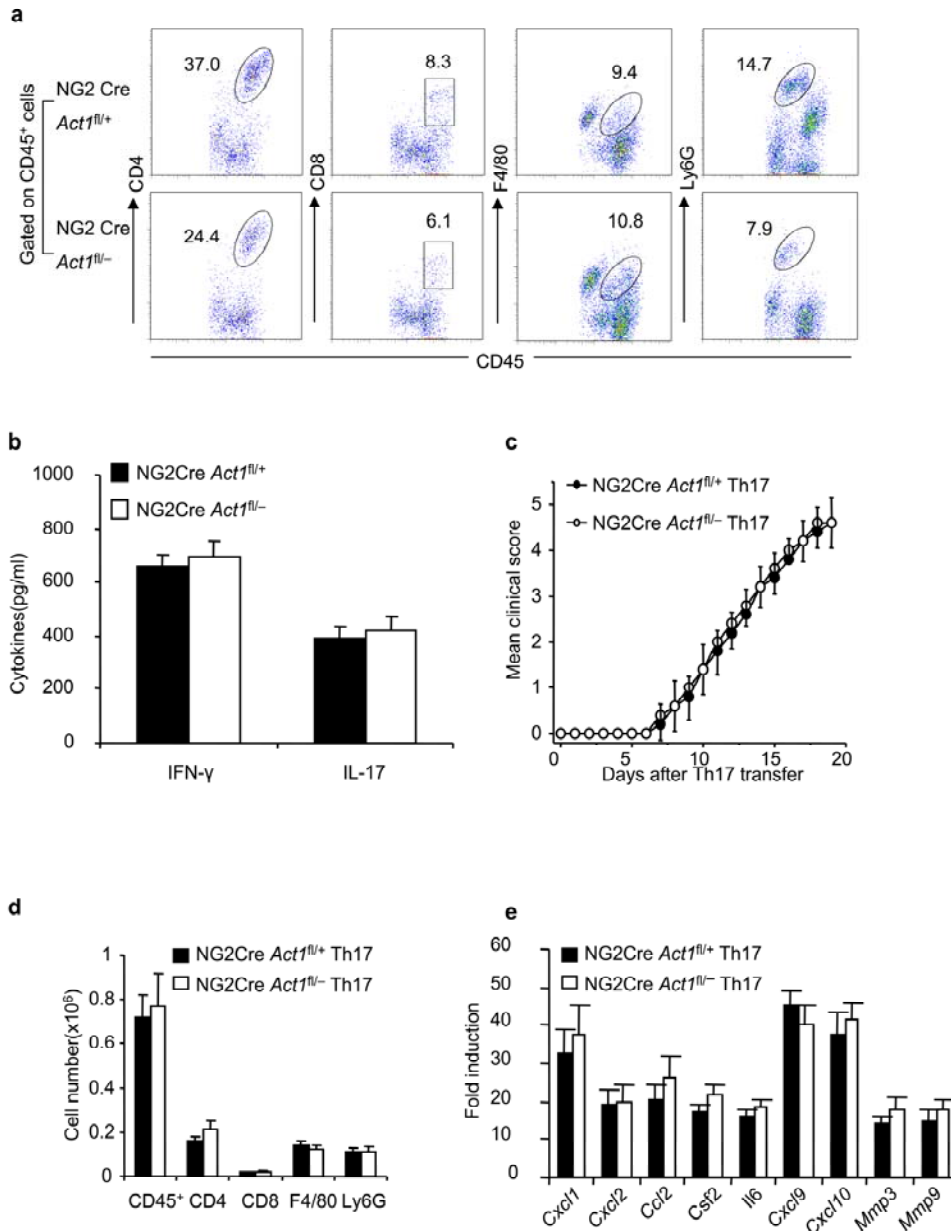

**Supplementary Figure 1 Th17 cells from NG2Cre *Act1<sup>fl/-</sup>* mice can induce EAE.** (a) Flow cytometric analysis show the frequency of different subsets of infiltrated leucocytes in brains of NG2Cre *Act1<sup>fl/+</sup>* and NG2Cre *Act1<sup>fl/-</sup>* mice 20 days after Th17 cell transfer. (b) Draining lymph node cells from NG2Cre *Act1<sup>fl/+</sup>* and NG2Cre *Act1<sup>fl/-</sup>* mice 10 days after immunization with MOG<sub>35-55</sub> were re-stimulated with MOG<sub>35-55</sub> in vitro for 4 days, followed by ELISA assay of IL-17 and IFN- $\gamma$ . (c) Mean clinical score of EAE in wild-type recipient mice induced by MOG<sub>35-55</sub>-specific NG2Cre *Act1<sup>fl/-</sup>* Th17 or NG2Cre *Act1<sup>fl/+</sup>* Th17 cells. (d) Absolute number of immune cell infiltration in the brains of EAE mice as indicated (19 days after Th17 transfer). (e) Real-time PCR analysis of inflammatory gene expression in the spinal cords of EAE mice as indicated. Data are representative of three independent experiments. n=5/group in each experiment. Error bars, SEM. p>0.05 at b-d.

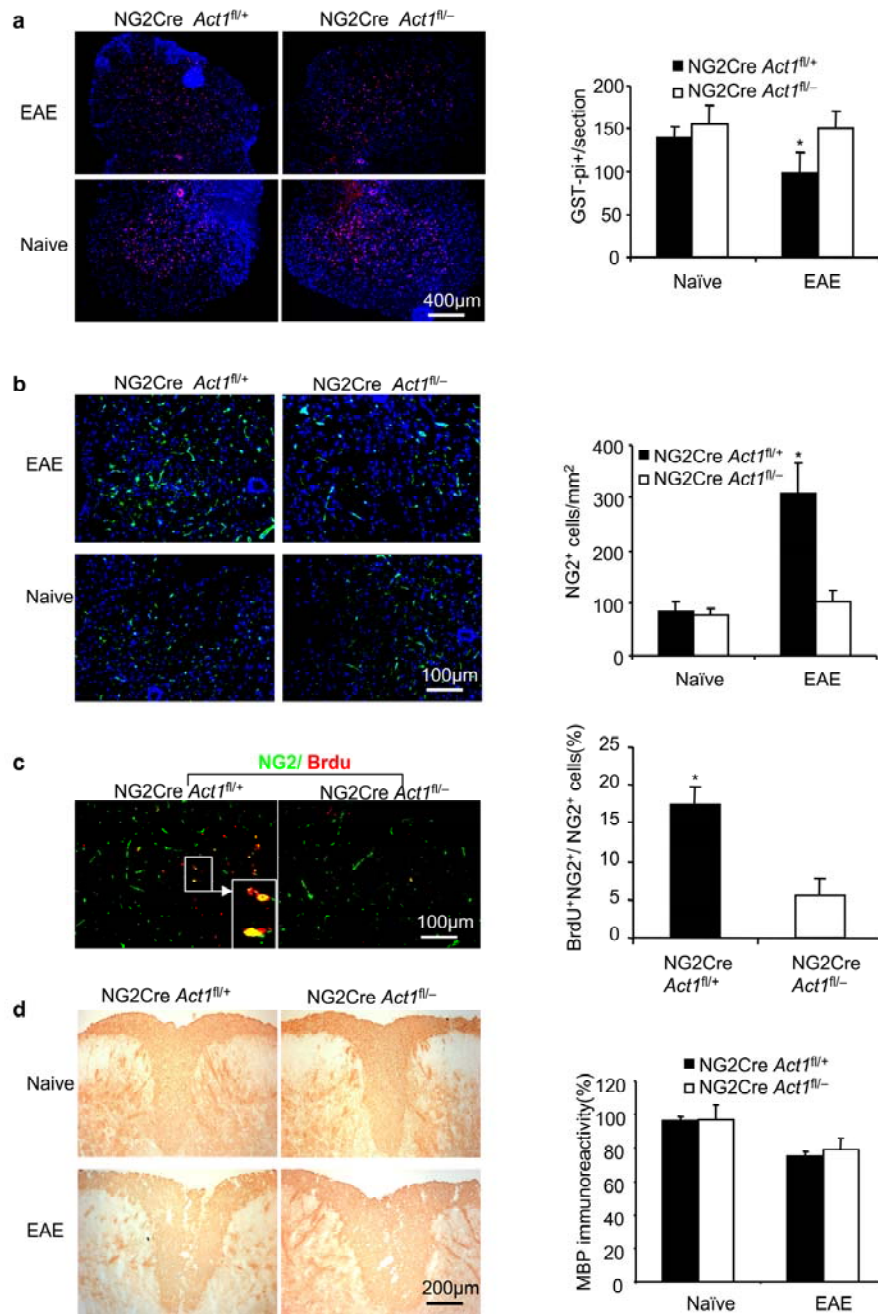

**Supplementary Figure 2 Change of oligodendroglia in the NG2CreAct1<sup>fl/+</sup> and NG2CreAct1<sup>fl/-</sup> mice before and after EAE.** NG2CreAct1<sup>fl/+</sup> and NG2CreAct1<sup>fl/-</sup> mice subjected to EAE by Th17 adoptive transfer(a-c) or Th1 adoptive transfer(d). (a) GST-pi<sup>+</sup> cells per section were counted from lumbar spinal cords of NG2Cre Act1<sup>fl/+</sup> and NG2Cre Act1<sup>fl/-</sup> mice before and after EAE(7 days after onset of EAE). (b) NG2<sup>+</sup> cells/mm<sup>2</sup> in the dorsal region were counted from lumbar spinal cords of NG2Cre Act1<sup>fl/+</sup> and NG2Cre Act1<sup>fl/-</sup> mice before and after EAE(7 days after onset of EAE). (c) EAE mice were injected with BrdU at 1mg/mouse 24 hours before sacrifice, then spinal cords were collected from NG2CreAct1<sup>fl/-</sup> and NG2CreAct1<sup>fl/+</sup> EAE mice(7 days after onset of EAE), ratio of BrdU cells to NG2<sup>+</sup> cell are shown. (d) MBP myelination in lumbar spinal cords of NG2CreAct1<sup>fl/-</sup> and NG2CreAct1<sup>fl/+</sup> mice before and after Th1 EAE(20 days after Th1 transfer) were analyzed by immunohistochemical staining. Data are representative of three independent experiments. n=5/group in each experiment. Error bars, SEM. \*p<0.05.

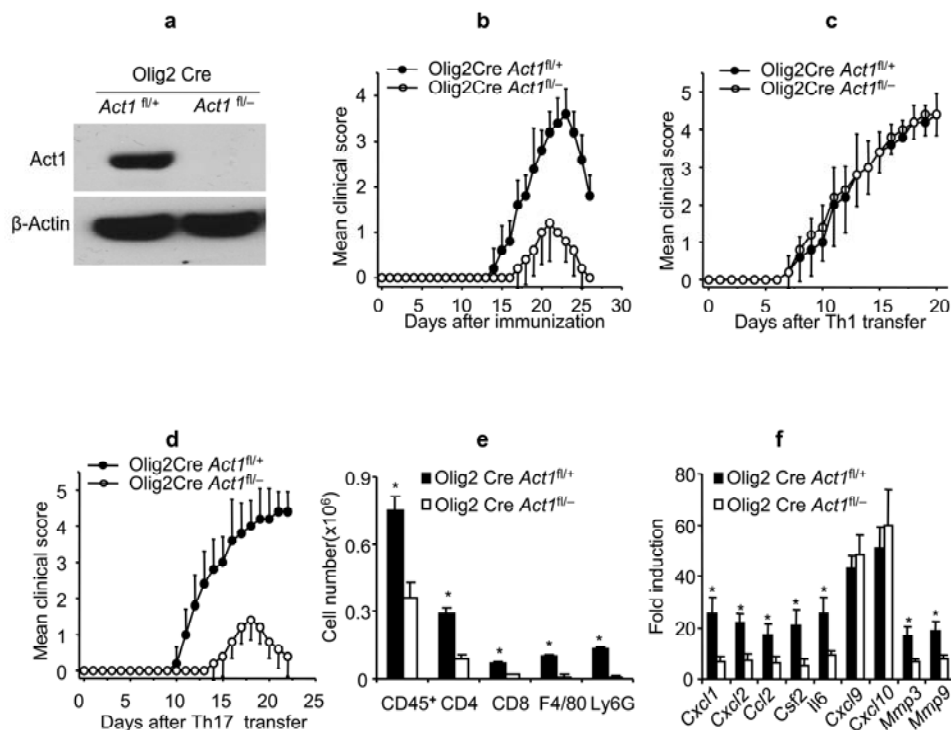

**Supplementary Figure 3 Olig2 Cre-mediated ablation of Act1 in oligodendrocyte lineage ameliorates autoimmune encephalomyelitis.** (a) Immunoblot analysis for the Act1 expression in cultured Olig2<sup>+</sup> cells from embryonic brains. Full-length blots are presented in Supplementary Figure 5. (b) Mean clinical score of EAE in Olig2CreAct1<sup>fl-/-</sup> and Olig2CreAct1<sup>fl/+</sup> mice induced by active immunization with MOG<sub>35-55</sub> (p<0.05, two-way ANOVA). (c) Mean clinical score of EAE in Olig2CreAct1<sup>fl-/-</sup> and Olig2CreAct1<sup>fl/+</sup> mice induced by Th1 adoptive transfer (p>0.05, two-way ANOVA). (d) Mean clinical score of EAE in Olig2CreAct1<sup>fl-/-</sup> and Olig2CreAct1<sup>fl/+</sup> mice induced by Th17 adoptive transfer (p<0.05, two-way ANOVA). (e) Absolute cell numbers of infiltrated immune cells in the brains of Olig2CreAct1<sup>fl-/-</sup> and Olig2CreAct1<sup>fl/+</sup> mice (20 days after Th17 cell transfer). (f) Real-time PCR analysis of inflammatory gene expression in the spinal cords of Olig2CreAct1<sup>fl-/-</sup> and Olig2CreAct1<sup>fl/+</sup> mice transferred with MOG<sub>35-55</sub>-specific Th17 cells. Data are representative of three independent experiments. n=5/group in each experiment. Error bars, SEM; \*p<0.05.

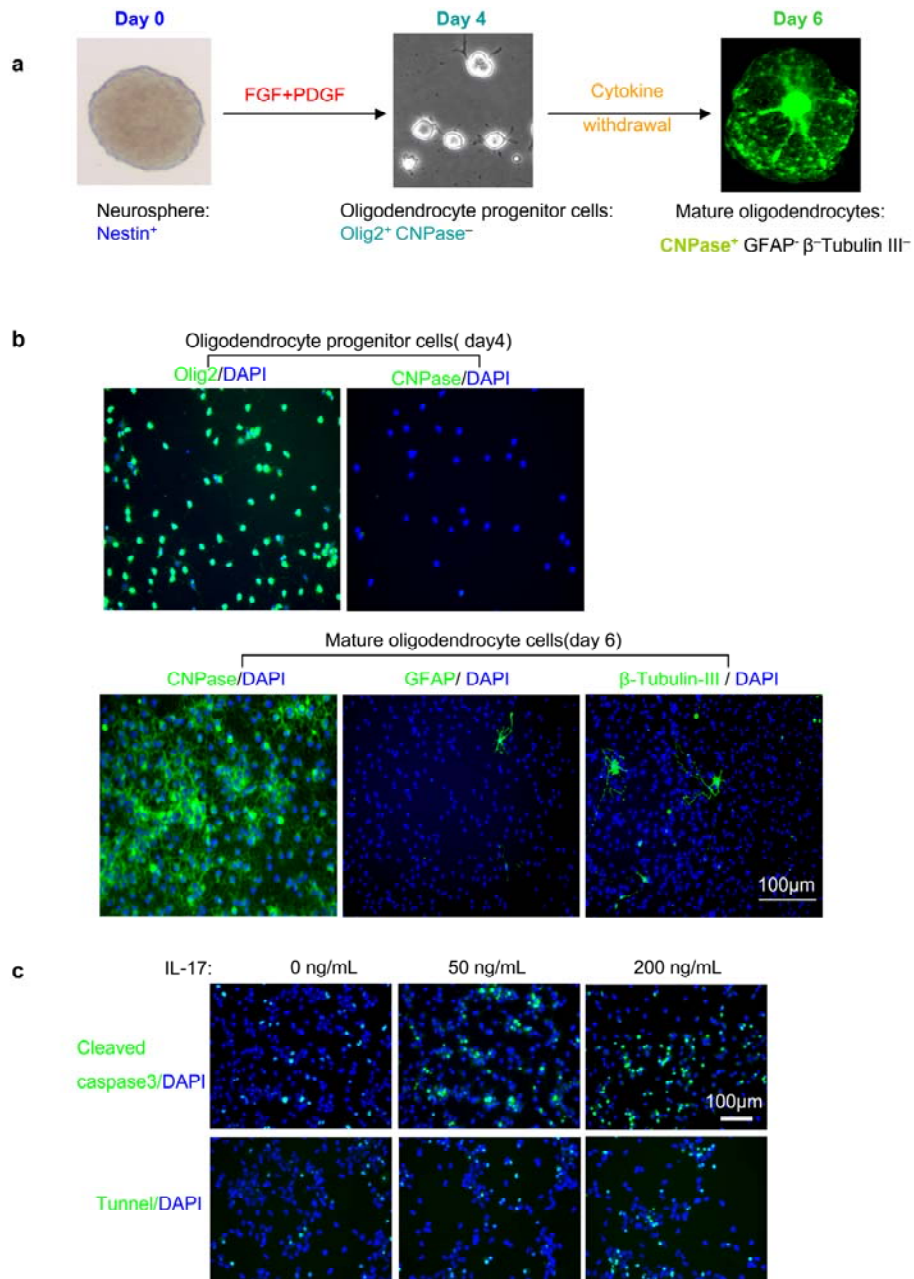

**Supplementary Figure 4 Characterization of oligodendroglia cells.** (a) Flow chart of oligodendroglia culture. (b) Characterization of OPCs (upper panel) and mature oligodendrocytes (lower panel). OPCs are Olig2<sup>+</sup>CNPase<sup>-</sup> cells and mature oligodendrocytes are CNPase<sup>+</sup> GFAP<sup>-</sup> β-tubulin-III<sup>-</sup> cells. (c) TUNEL and cleaved caspase 3 assays indicate the apoptotic cells after a 4-day culture of wild-type OPCs with/without IL-17 as indicated. n=5 mice, Data are representative of three independent experiments.

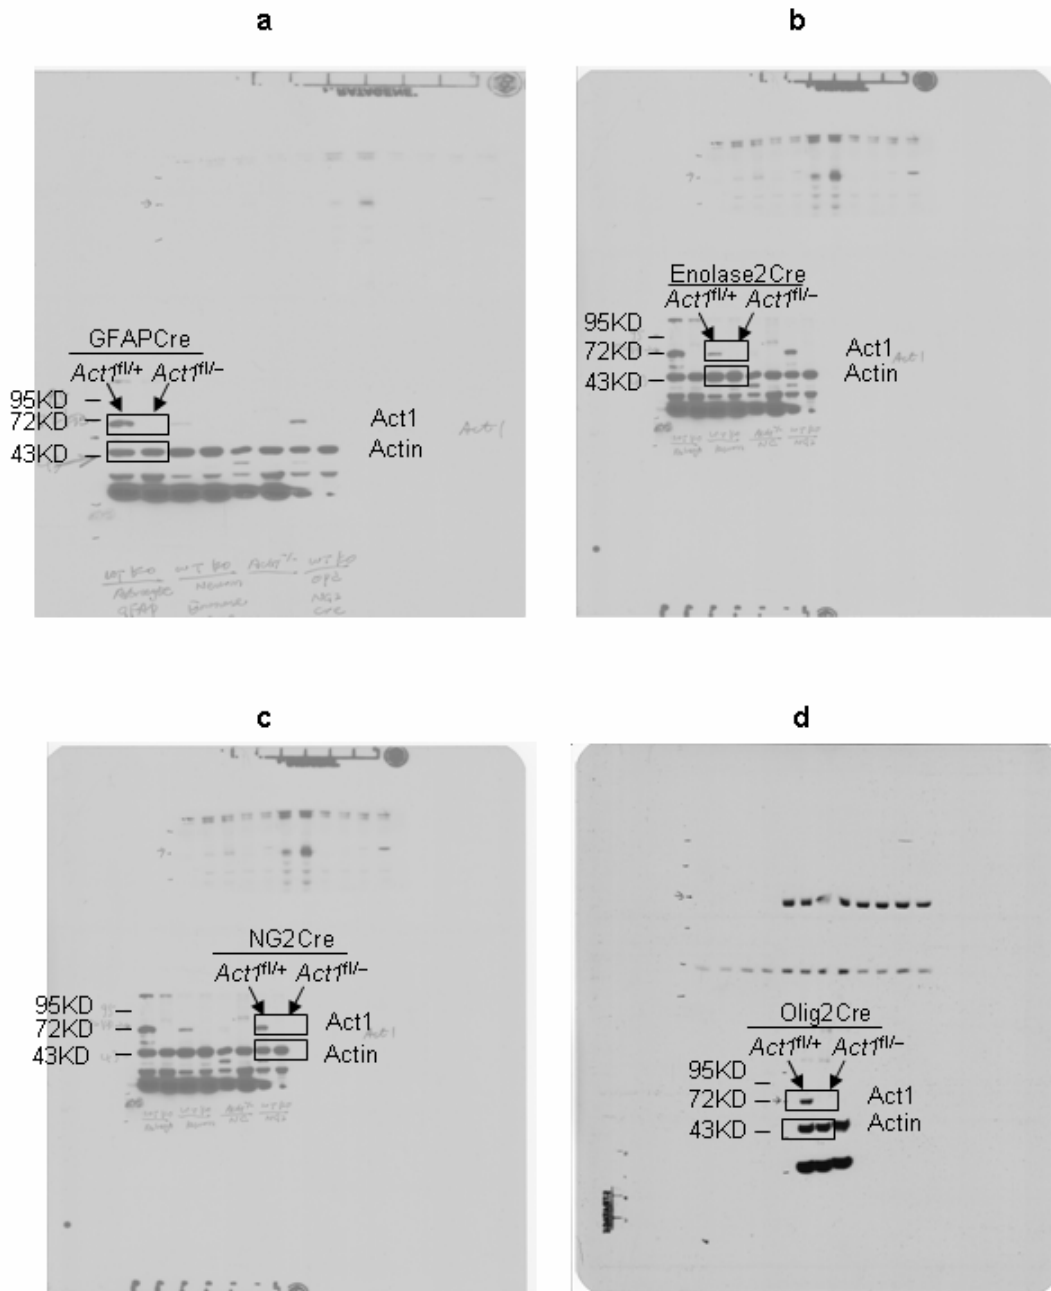

**Supplementary Figure 5: Full-length immunoblots presented in Fig.1a, Fig.2a, Fig.3a and Supplemental Fig.3a.** (a) Full size immunoblot for Fig.1a. (b) Full size immunoblot for Fig.2a. (c) Full size immunoblot for Fig.3a. (d) Full size immunoblot for Supplementary Fig.3a.

a

Short exposure

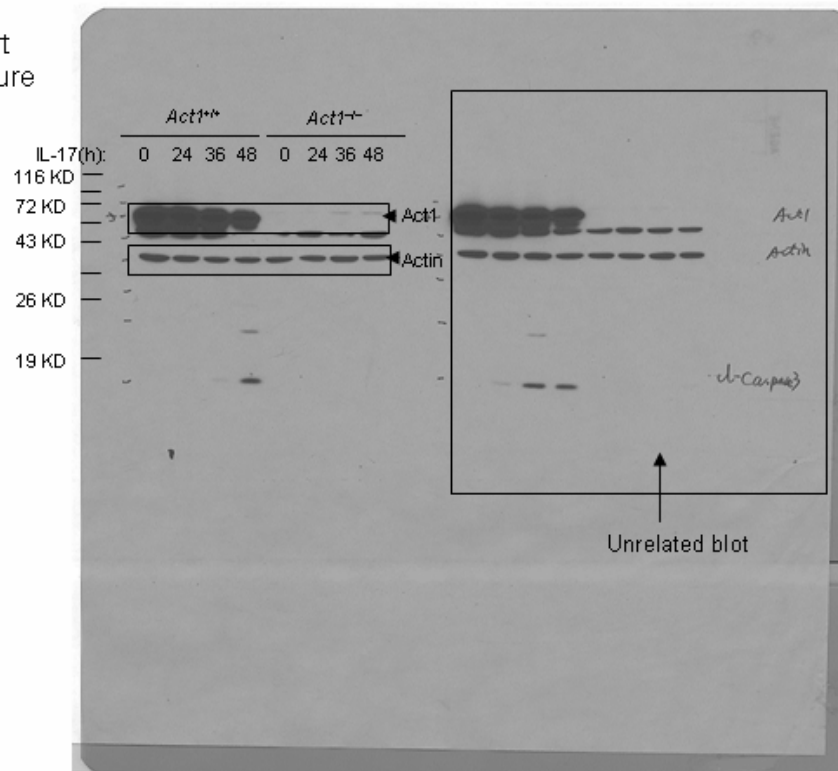

long exposure

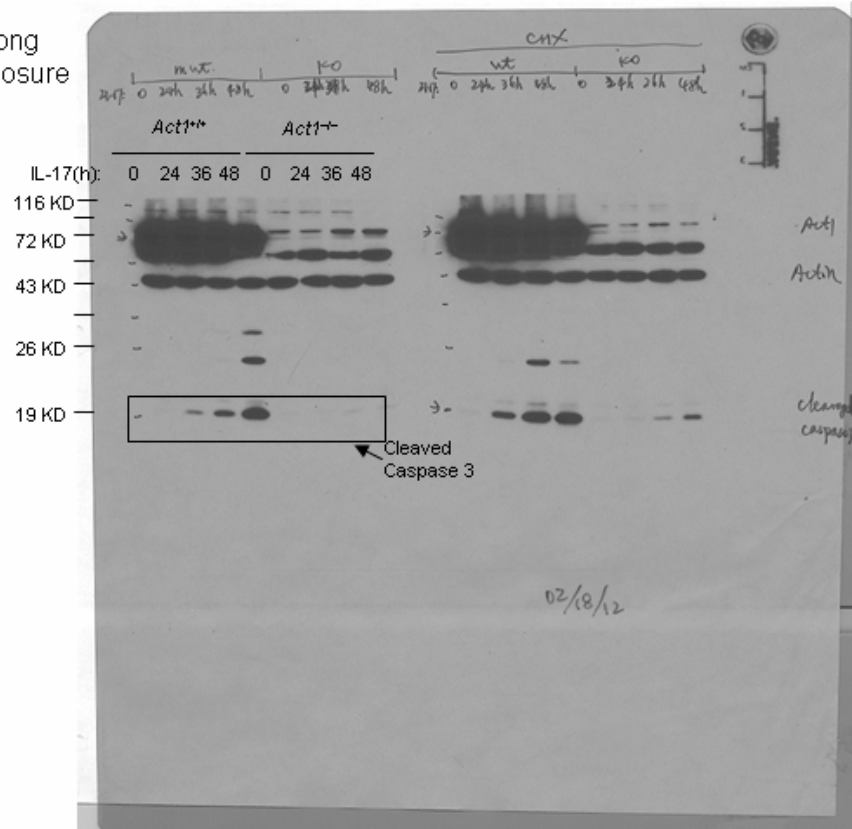

Supplementary Figure 6: Full-length immunoblots presented in Fig.6a

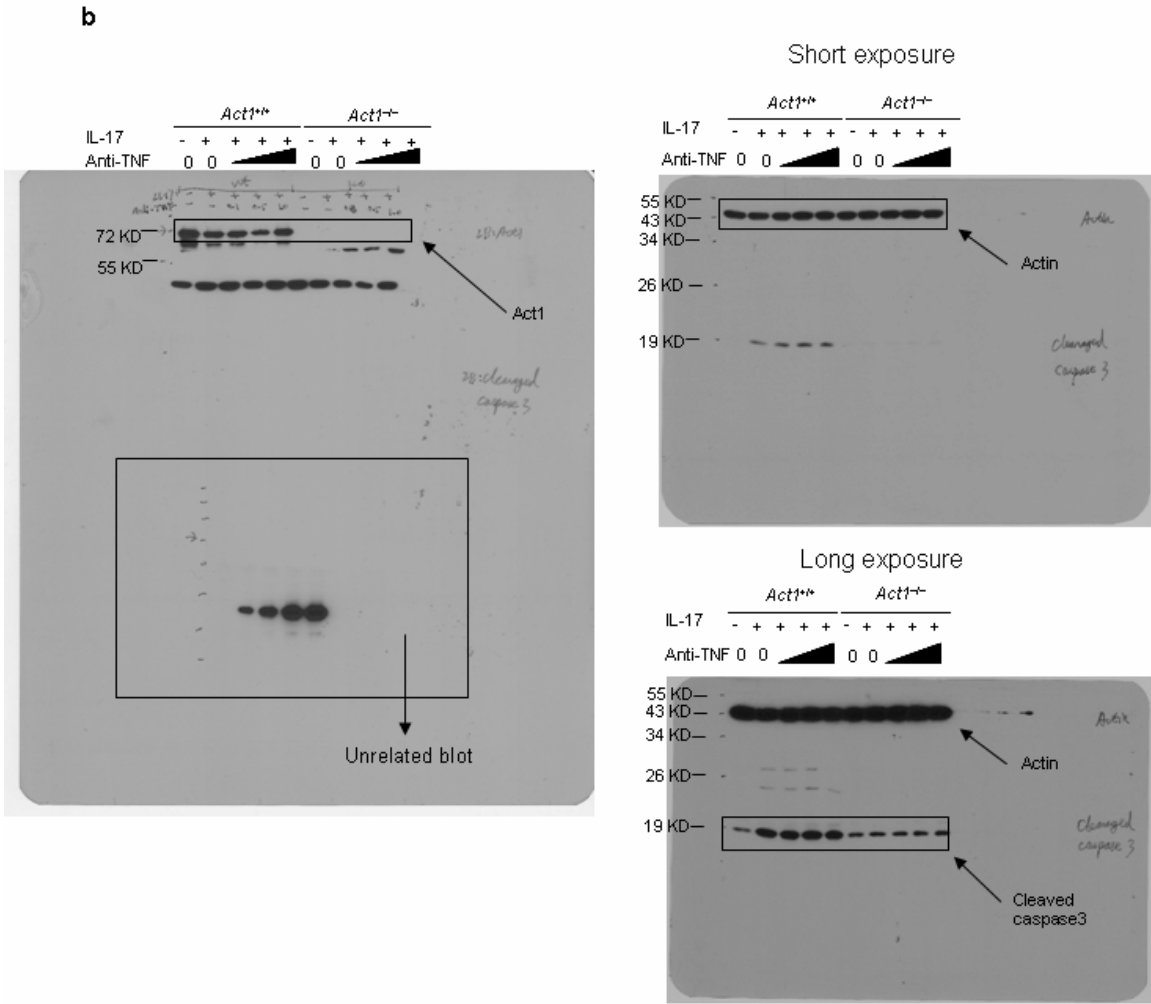

Supplementary Figure 6: Full-length immunoblots presented in Fig.6b



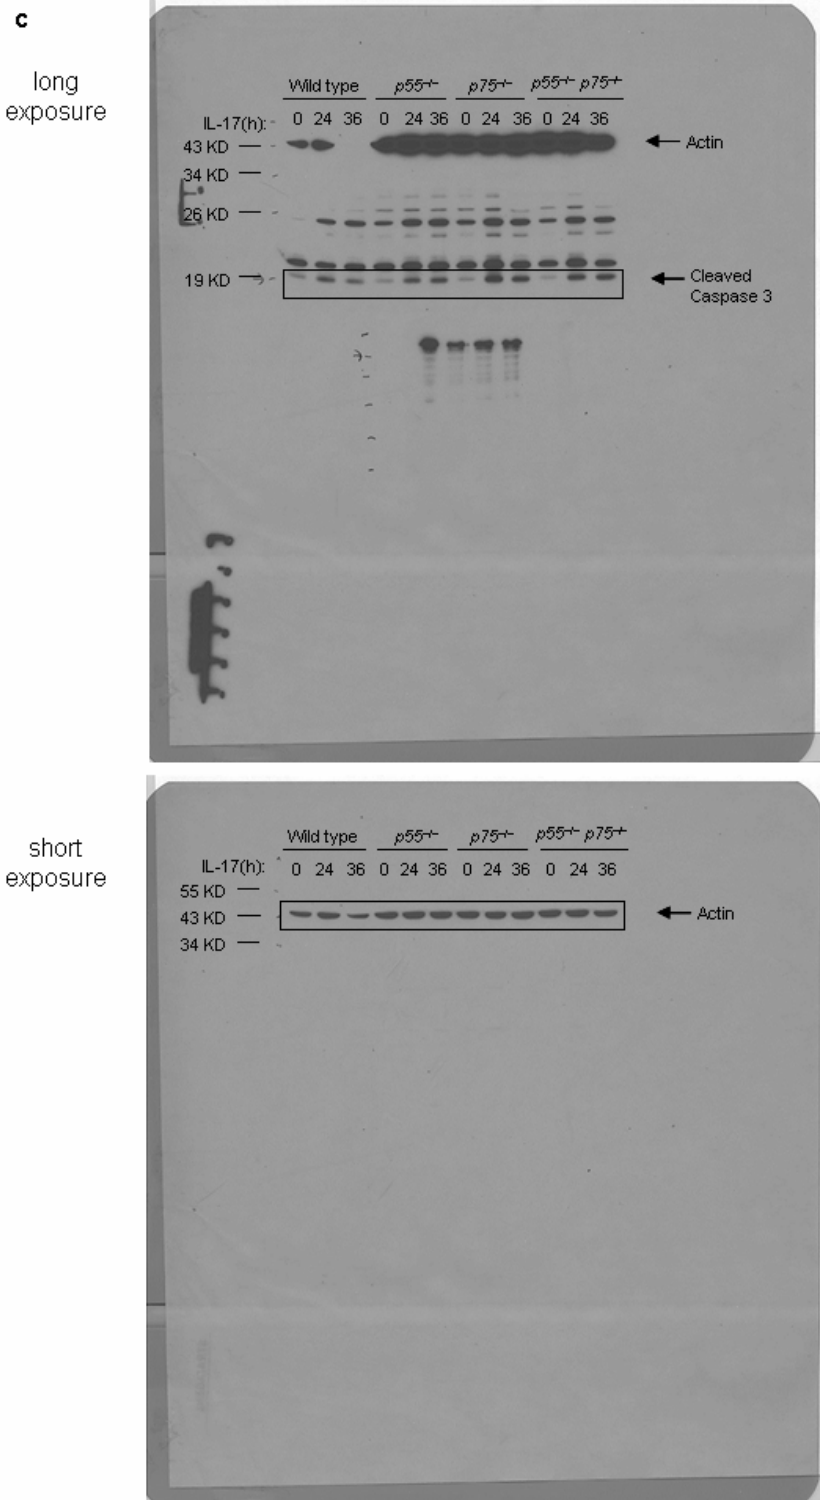

Supplementary Figure 6: Full-length immunoblots presented in Fig.6c

d

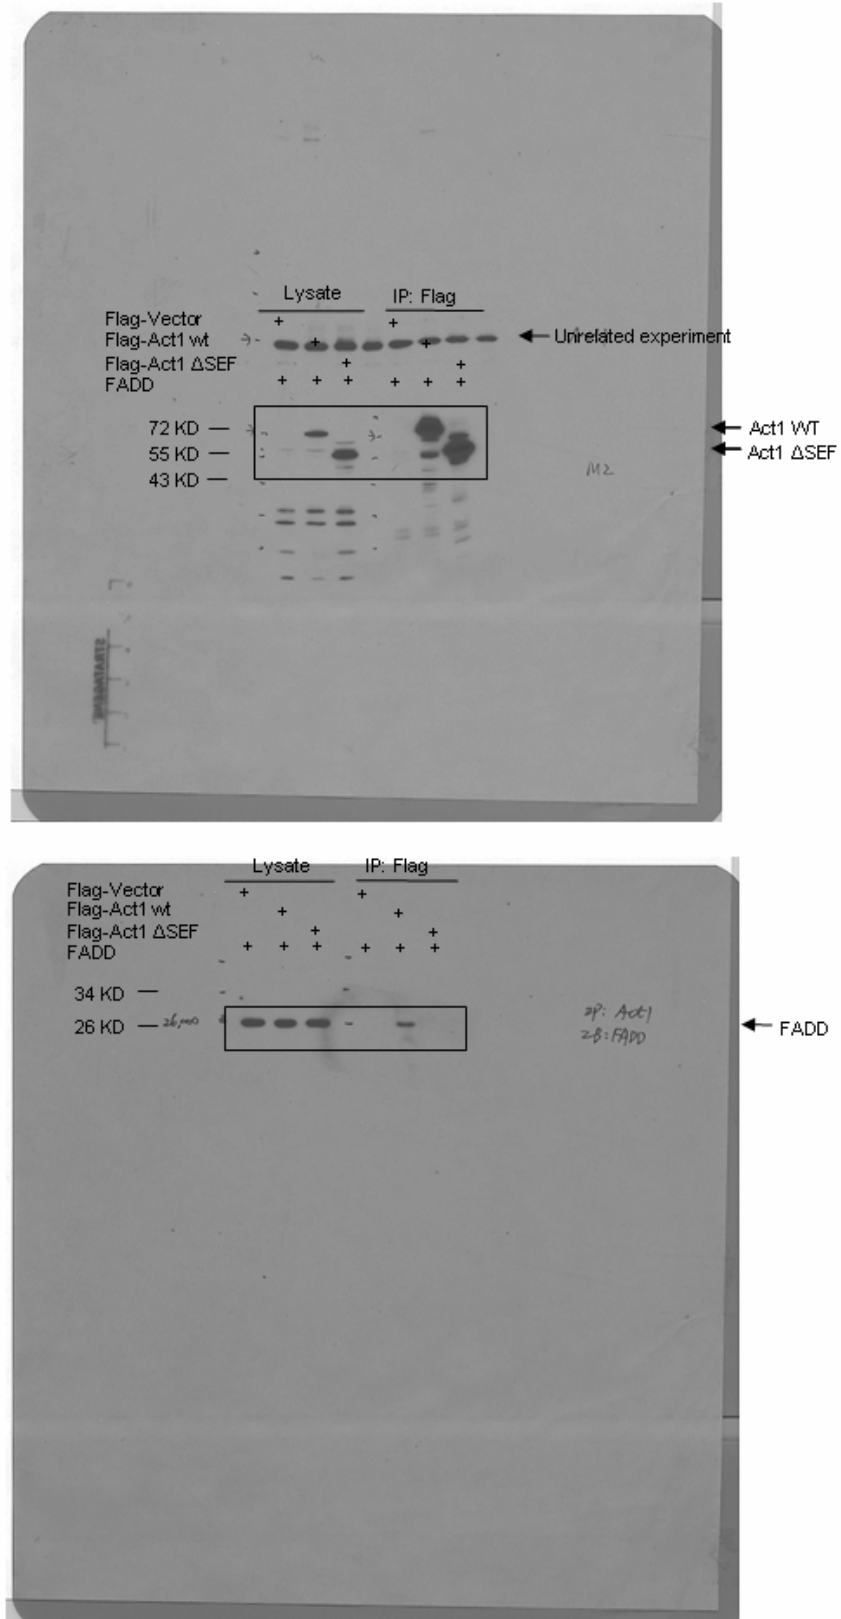

Supplementary Figure 6: Full-length immunoblots presented in Fig.6d

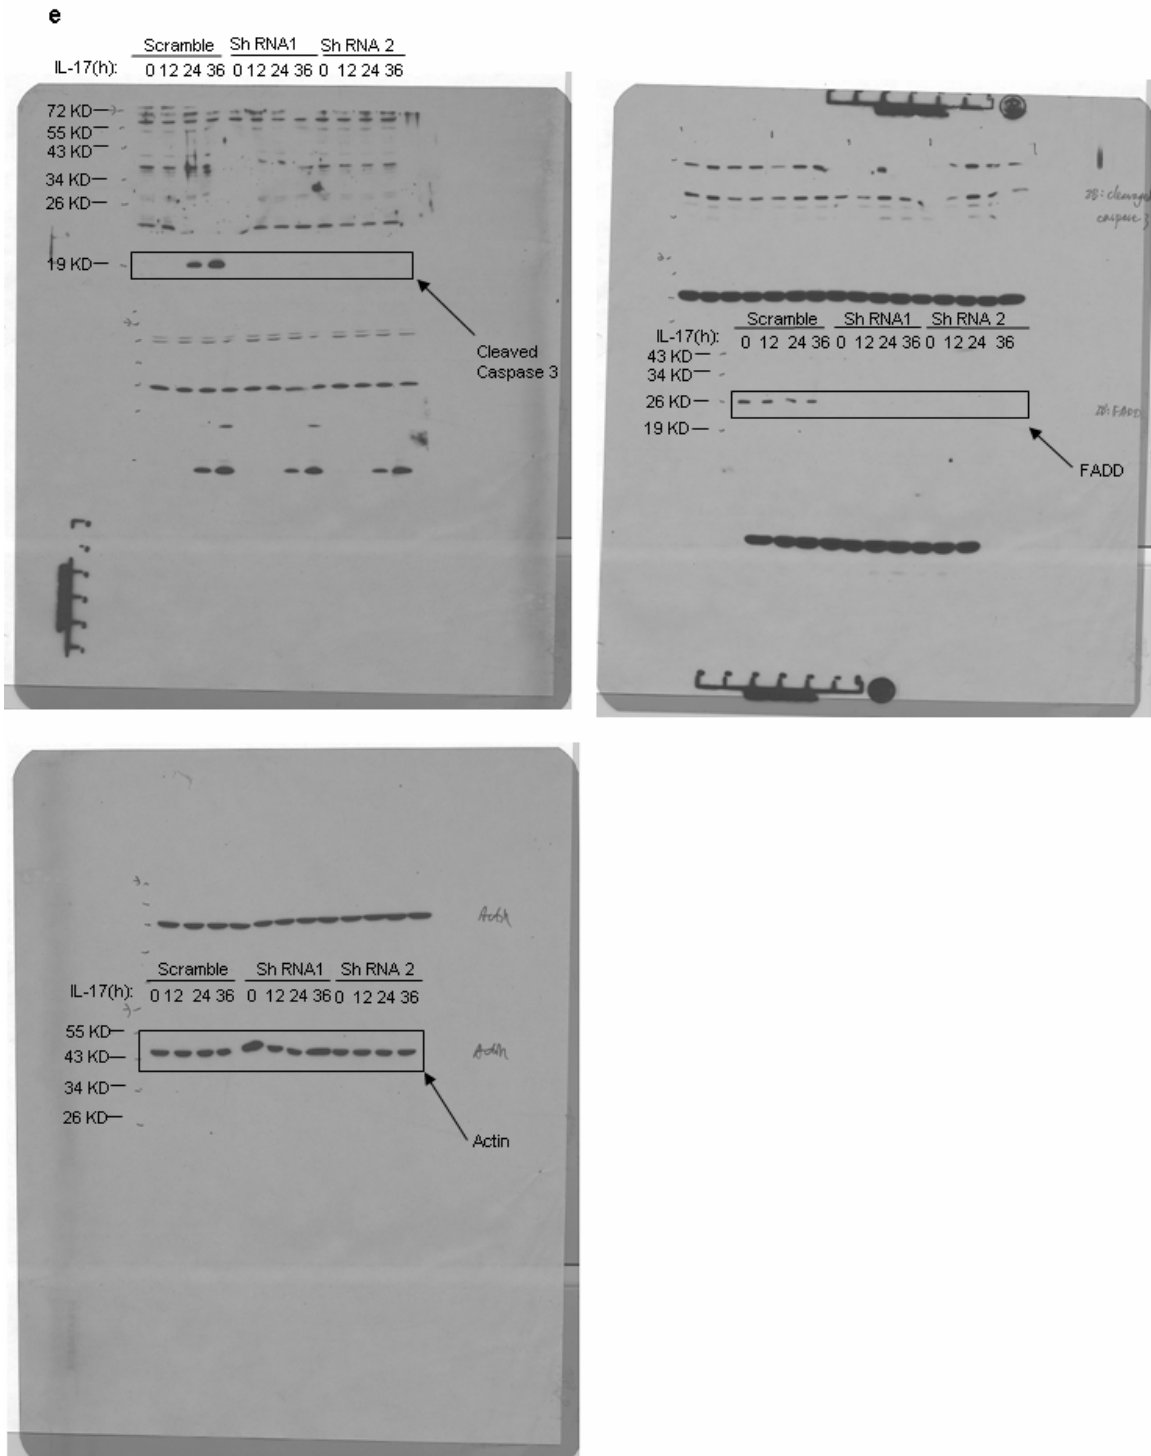

Supplementary Figure 6: Full-length immunoblots presented in Fig.6e
